# Supplementary material for: Decoding Single Cell Morphology in Osteotropic Breast Cancer Cells for Dissecting Their Migratory, Molecular and Biophysical Heterogeneity
Source: MDPI journal article supplement (doi:10.3390/cancers14030603), 2022-01-25
Supplement: s1 [file s1]

# Decoding Single Cell Morphology in Osteotropic Breast Cancer Cells for Dissecting Their Migratory, Molecular and Biophysical Heterogeneity

Lila Bemmerlein, Ilker A. Deniz, Jana Karbanová, Angela Jacobi, Stephan Drukewitz, Theresa Link, Andy Göbel, Lisa Sevenich, Anna V. Taubenberger, Pauline Wimberger, Jan Dominik Kuhlmann and Denis Corbeil

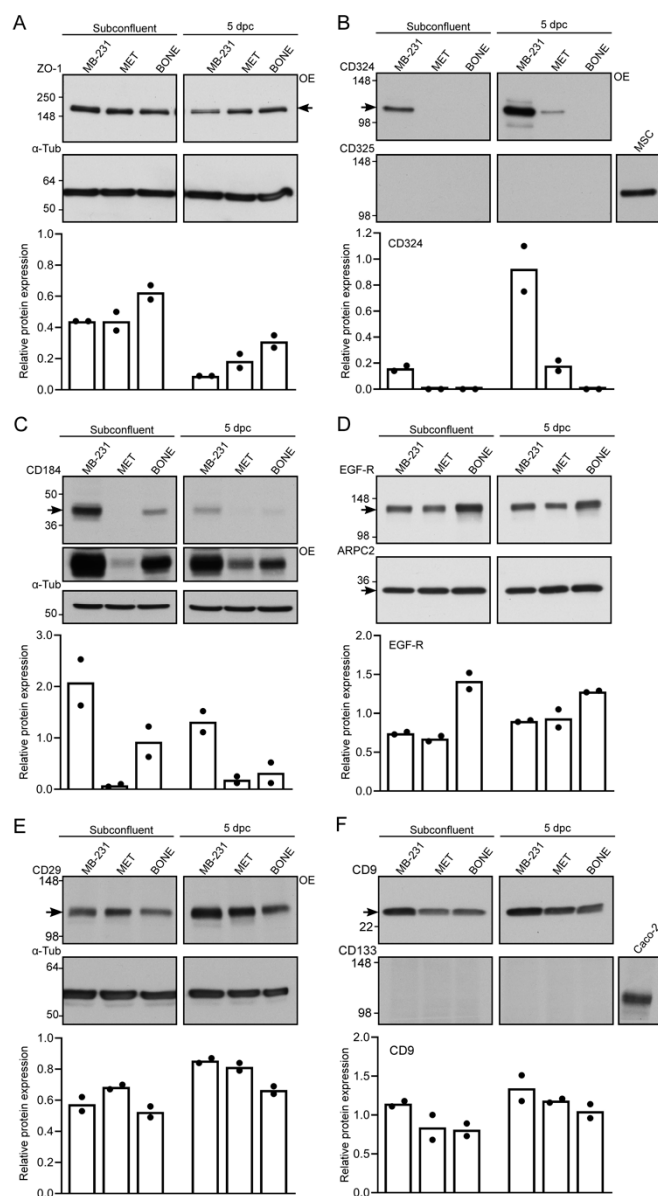

**Figure S1.** Expression of selected proteins in breast cancer cells. **A–F** Detergent cell lysates prepared from subconfluent and 5 days postconfluent (5 dpc) MB-231, MET and BONE cells were separated by SDS-PAGE under non-reducing (for CD9) or reducing (for others) conditions, and analyzed by immunoblotting using specific antibodies against selected proteins as indicated. Human mesenchymal stromal cells (MSC) [1] and colon carcinoma Caco-2 cells [2] were used as positive controls. Molecular mass markers (kDa) are shown. Arrows indicate proteins of interest. In

some cases, blots were overexposed (OE, i.e. 20 min instead 30 sec) to highlight the low expression of certain proteins. The relative expression of a given protein was quantified and normalized to  $\alpha$ -tubulin as a housekeeping protein. The mean of 2 independent experiments is presented, and each point represents the value of the individual experiment. EGF-R, EGF receptor.

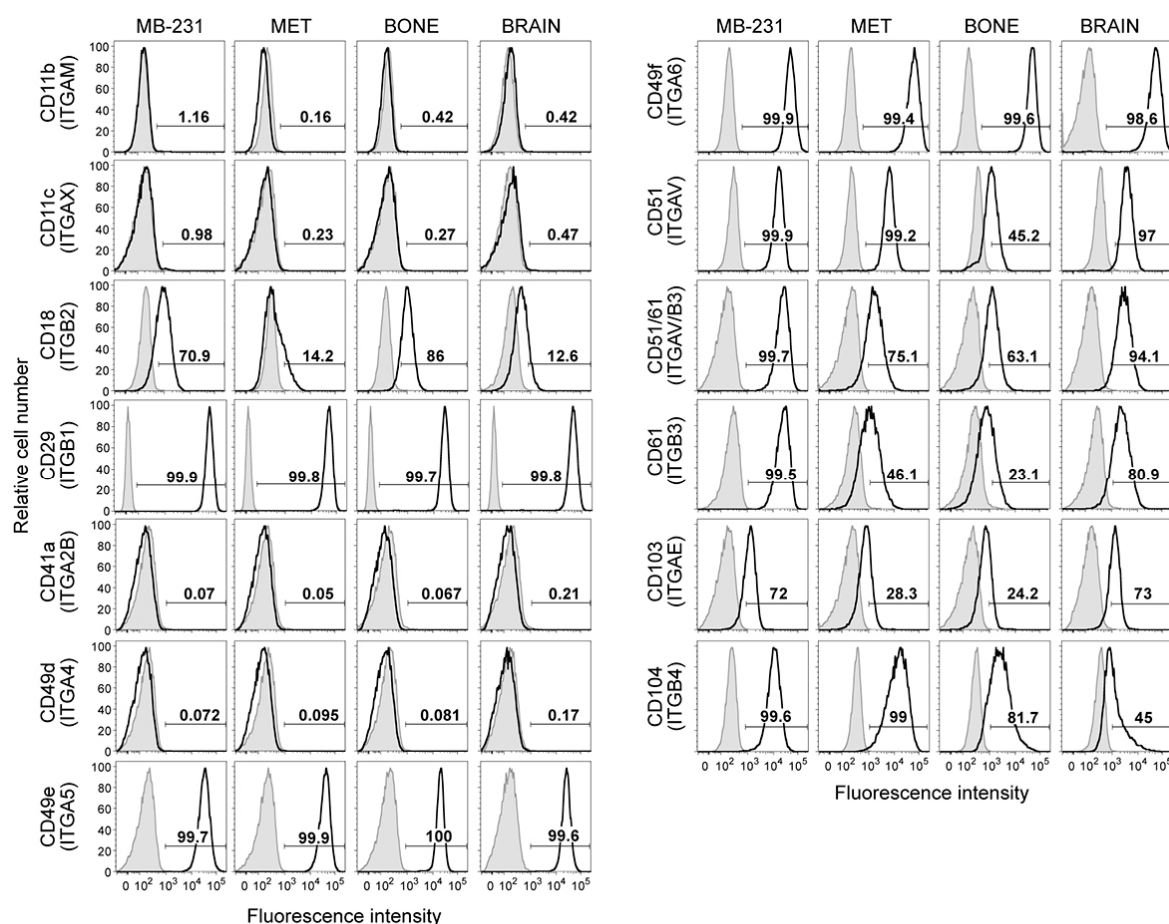

**Figure S2.** Differential expression of integrins between breast cancer cell lines. The parental cells MB-231 and its bone- and brain-seeking derivatives, MET/BONE and BRAIN, respectively, were cell surface immunolabeled for integrin molecules as indicated prior to flow cytometry analyses. Percentages of positive cells are indicated in the histograms. A representative experiment is displayed.

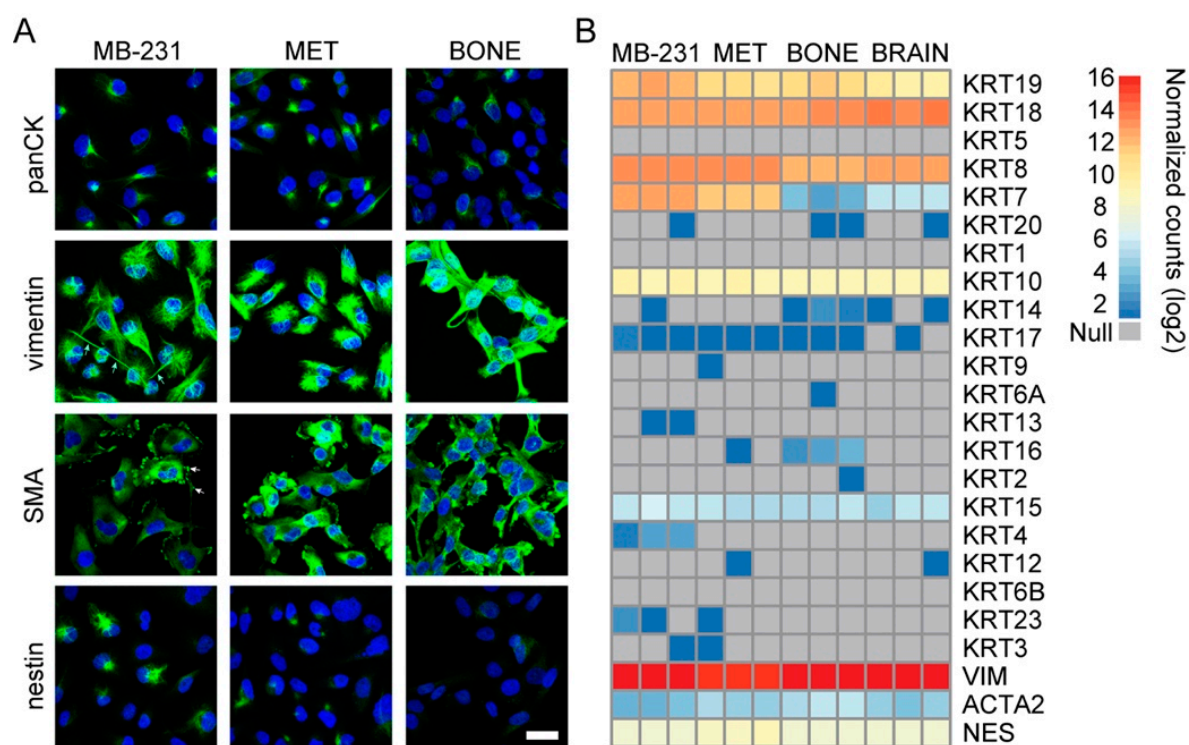

**Figure S3.** Differential expression of cytoplasmic proteins and their transcripts between breast cancer cell lines. **A** The parental cells MB-231 and its bone-seeking variants, MET and BONE, were fixed, permeabilized and immunolabeled for one of the indicated proteins, as indicated prior to cytochemistry. **B** Heatmap representations of differentially expressed genes. Note the enrichment of vimentin (VIM) and alpha smooth muscle actin (SMA, ACTA2) along the magnupodium (green arrow) or at its extremity (white arrow), respectively, in MB-231 cells (**A**). CK, cytokeratin. Scale bar, 25  $\mu$ m.

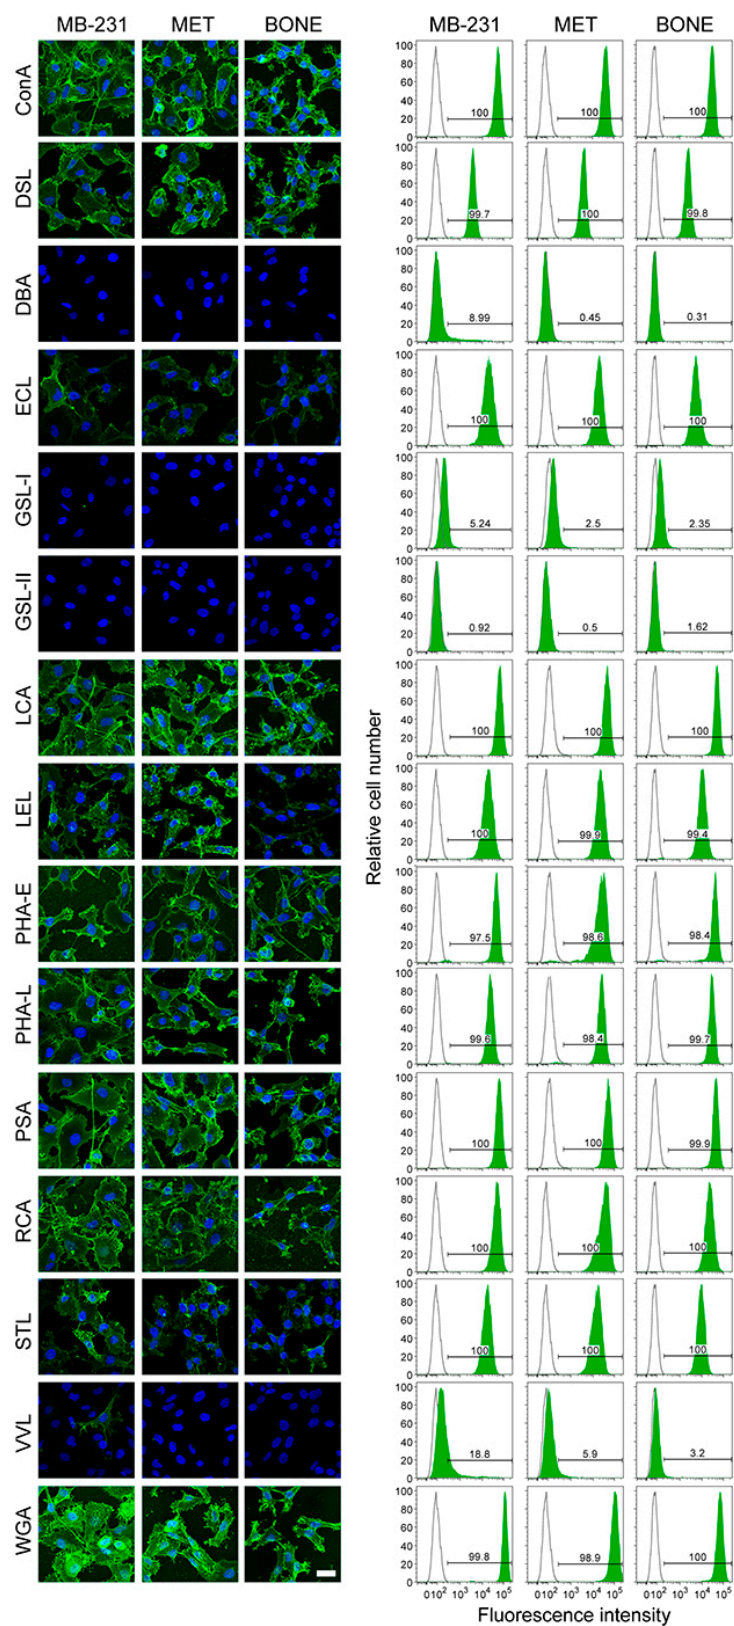

**Figure S4.** Binding of lectins to breast cancer cell lines. The parental cells MB-231 and its bone-seeking derivatives, MET and BONE, were cell surface labeled with one of a panel of distinct FITC-conjugated lectins prior to cytochemistry (left panels) and flow cytometry (right panels).

Numbers of positive cells are indicated in the histograms. Representative experiments are displayed. Scale bar, 25  $\mu$ m.

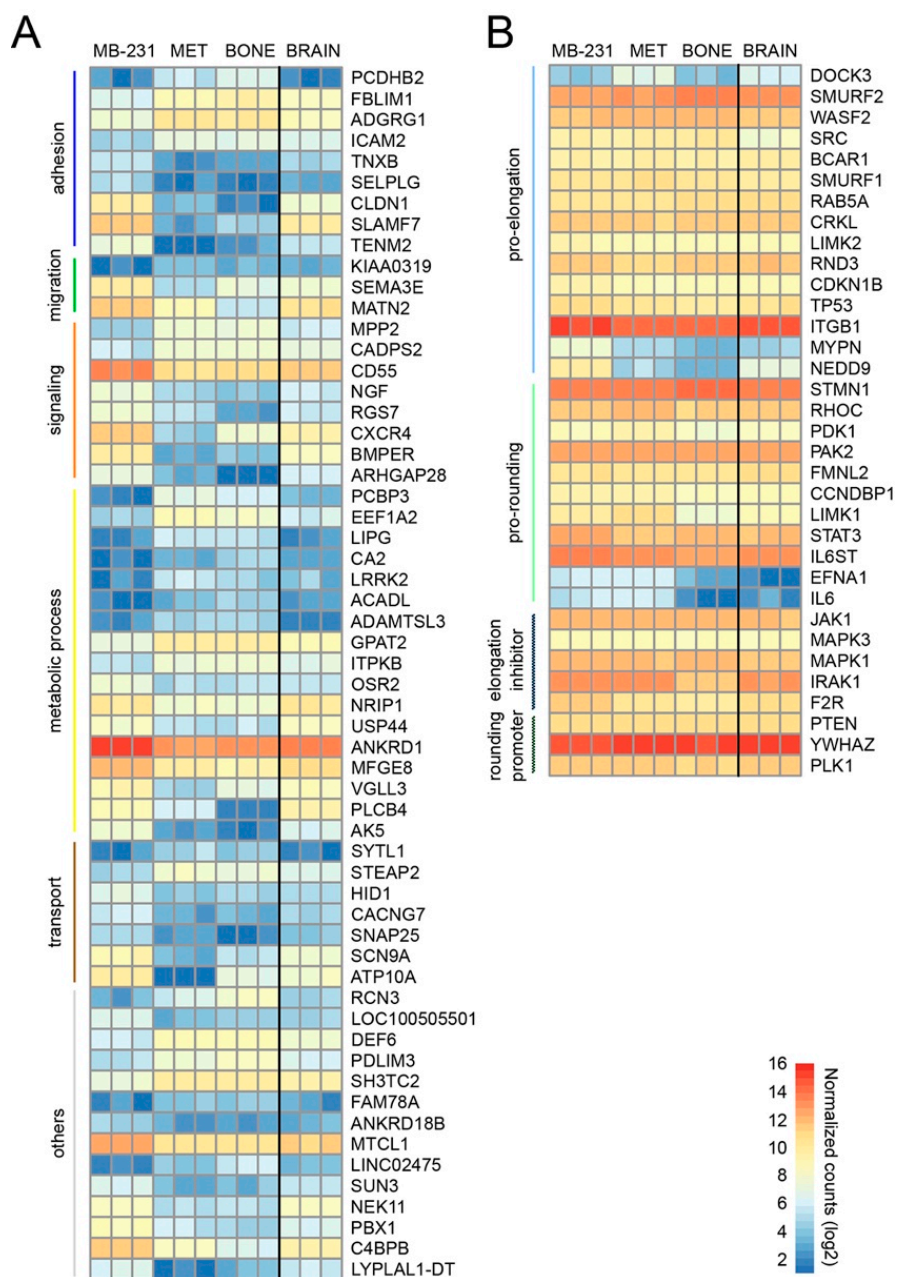

**Figure S5.** Differential gene expression in bone-seeking variants. **A, B** The heatmaps of genes (58) that are significantly differentially expressed ( $\log_2$  fold change  $>2$  or  $<-2$ ) in the bone-seeking variants (MET and BONE), but not in the brain-seeking variant (BRAIN), relative to the parental cells MB-231 (**A**, see Figure 9D) and those with impact on cell shape (**B**, see Figure 9G) are presented.



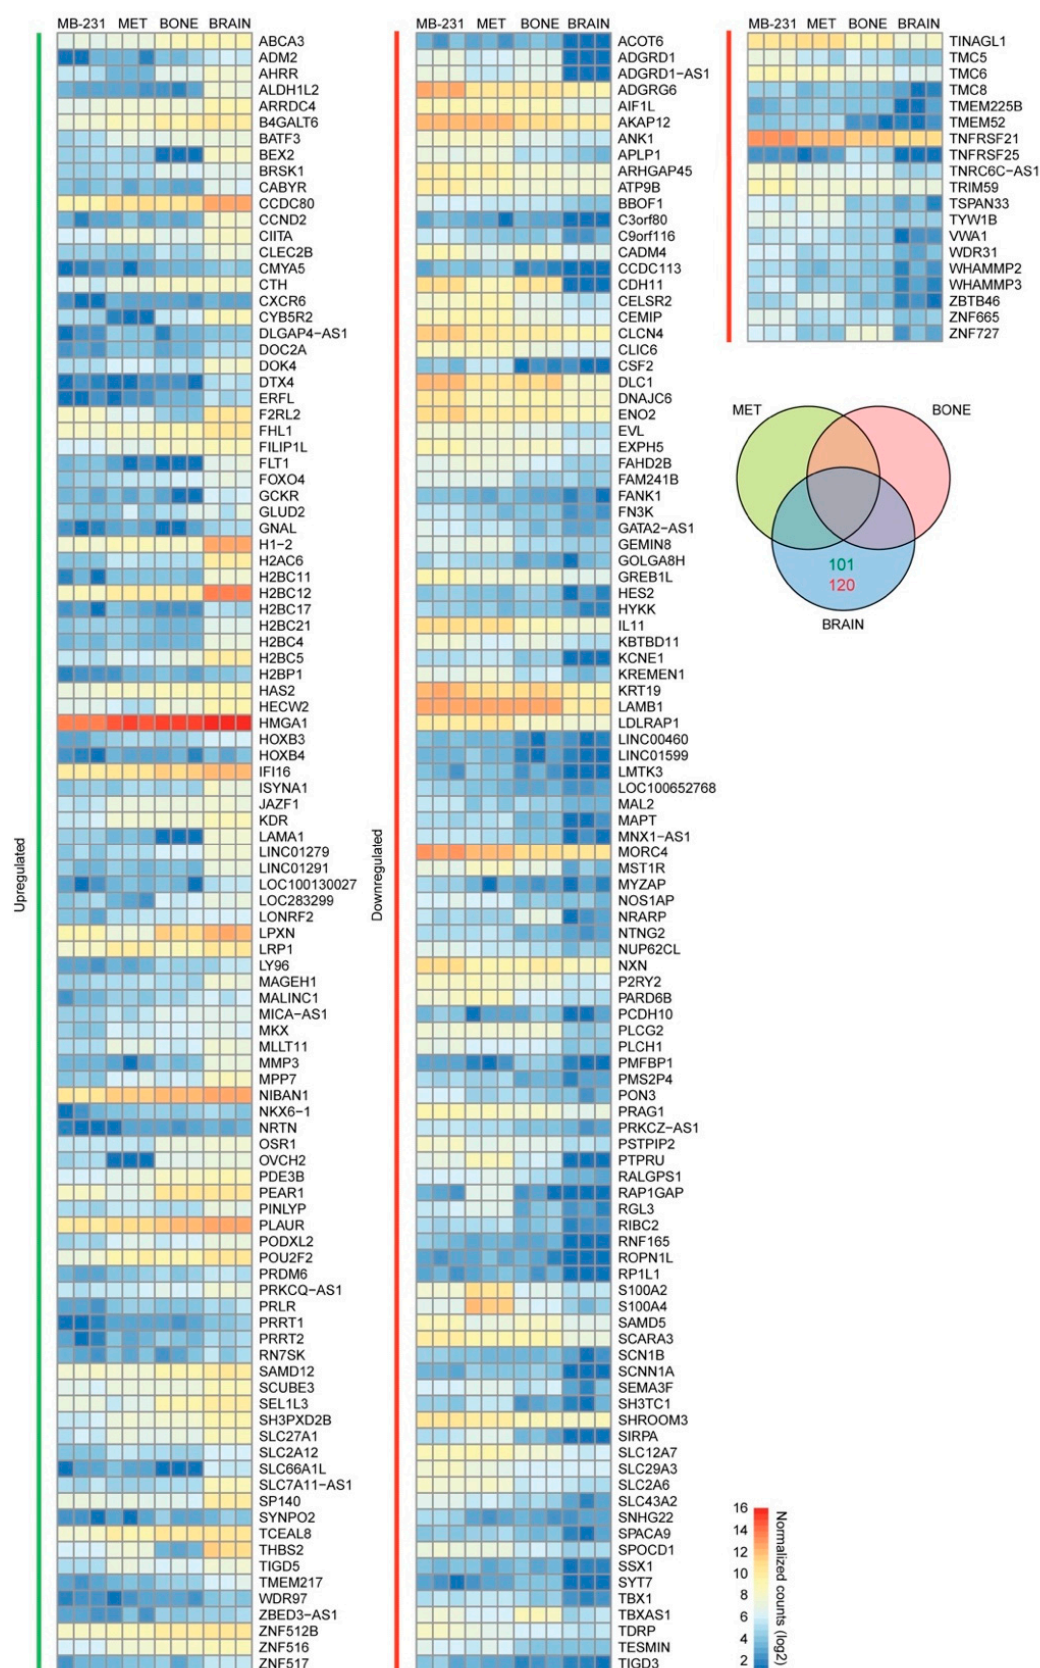

**Figure S6.** Differential gene expression in the brain-seeking variant. The heatmap and Venn diagram of the genes that are significantly differentially expressed only in the brain-seeking variant (BRAIN), but not in bone-seeking variants (MET and BONE), relative to the parental cells MB-231

cells are presented. Genes that are up- (101) and down- (120) regulated ( $\log_2$  fold change  $>2$  or  $<-2$ , respectively) are shown in green and red, respectively.

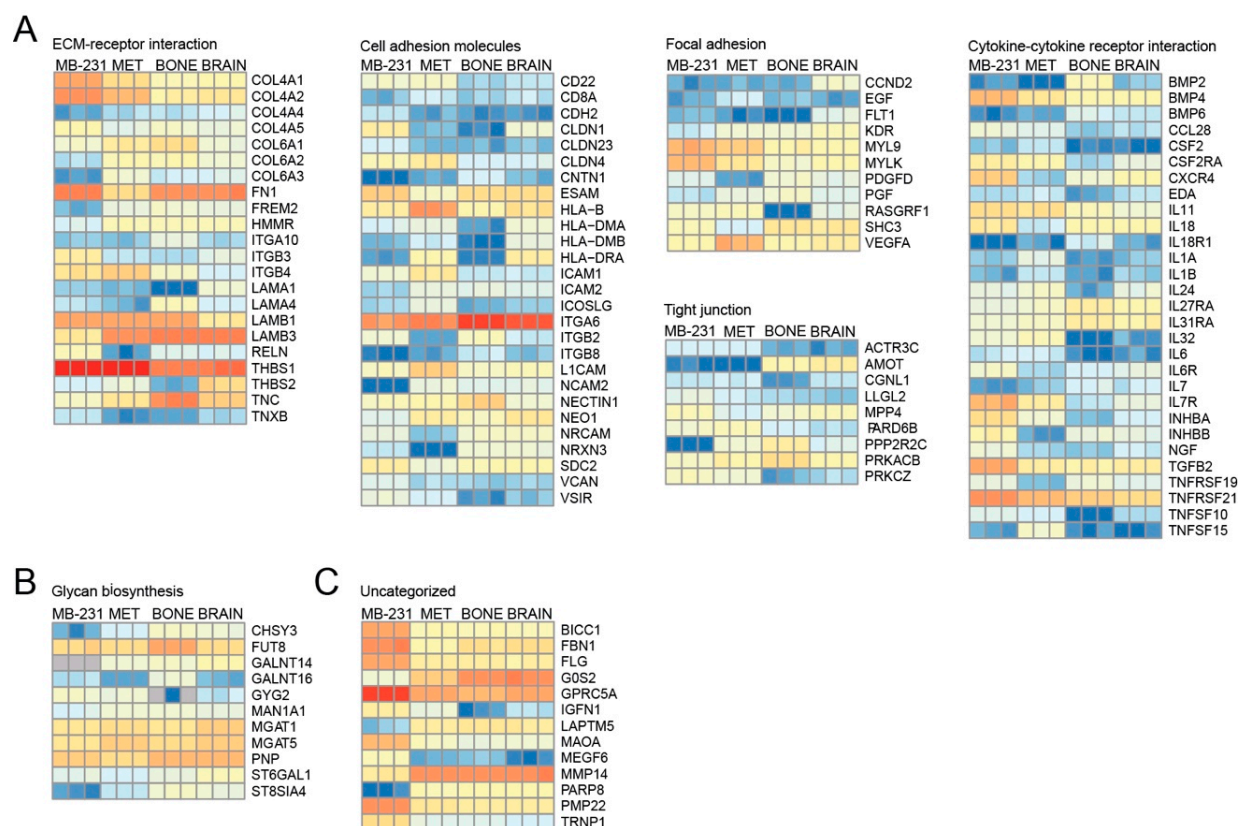

**Figure S7.** Differential gene expression in bone-seeking variants associated with different pathways. **A–C** Heatmap representations of significantly differentially expressed genes between the bone-seeking variants (MET and BONE), brain-seeking variant (BRAIN), and the parental cell line MB-231 ( $\log_2$  fold change  $>2$  or  $<-2$ ). The genes are classified into distinct KEGG pathways as indicated.



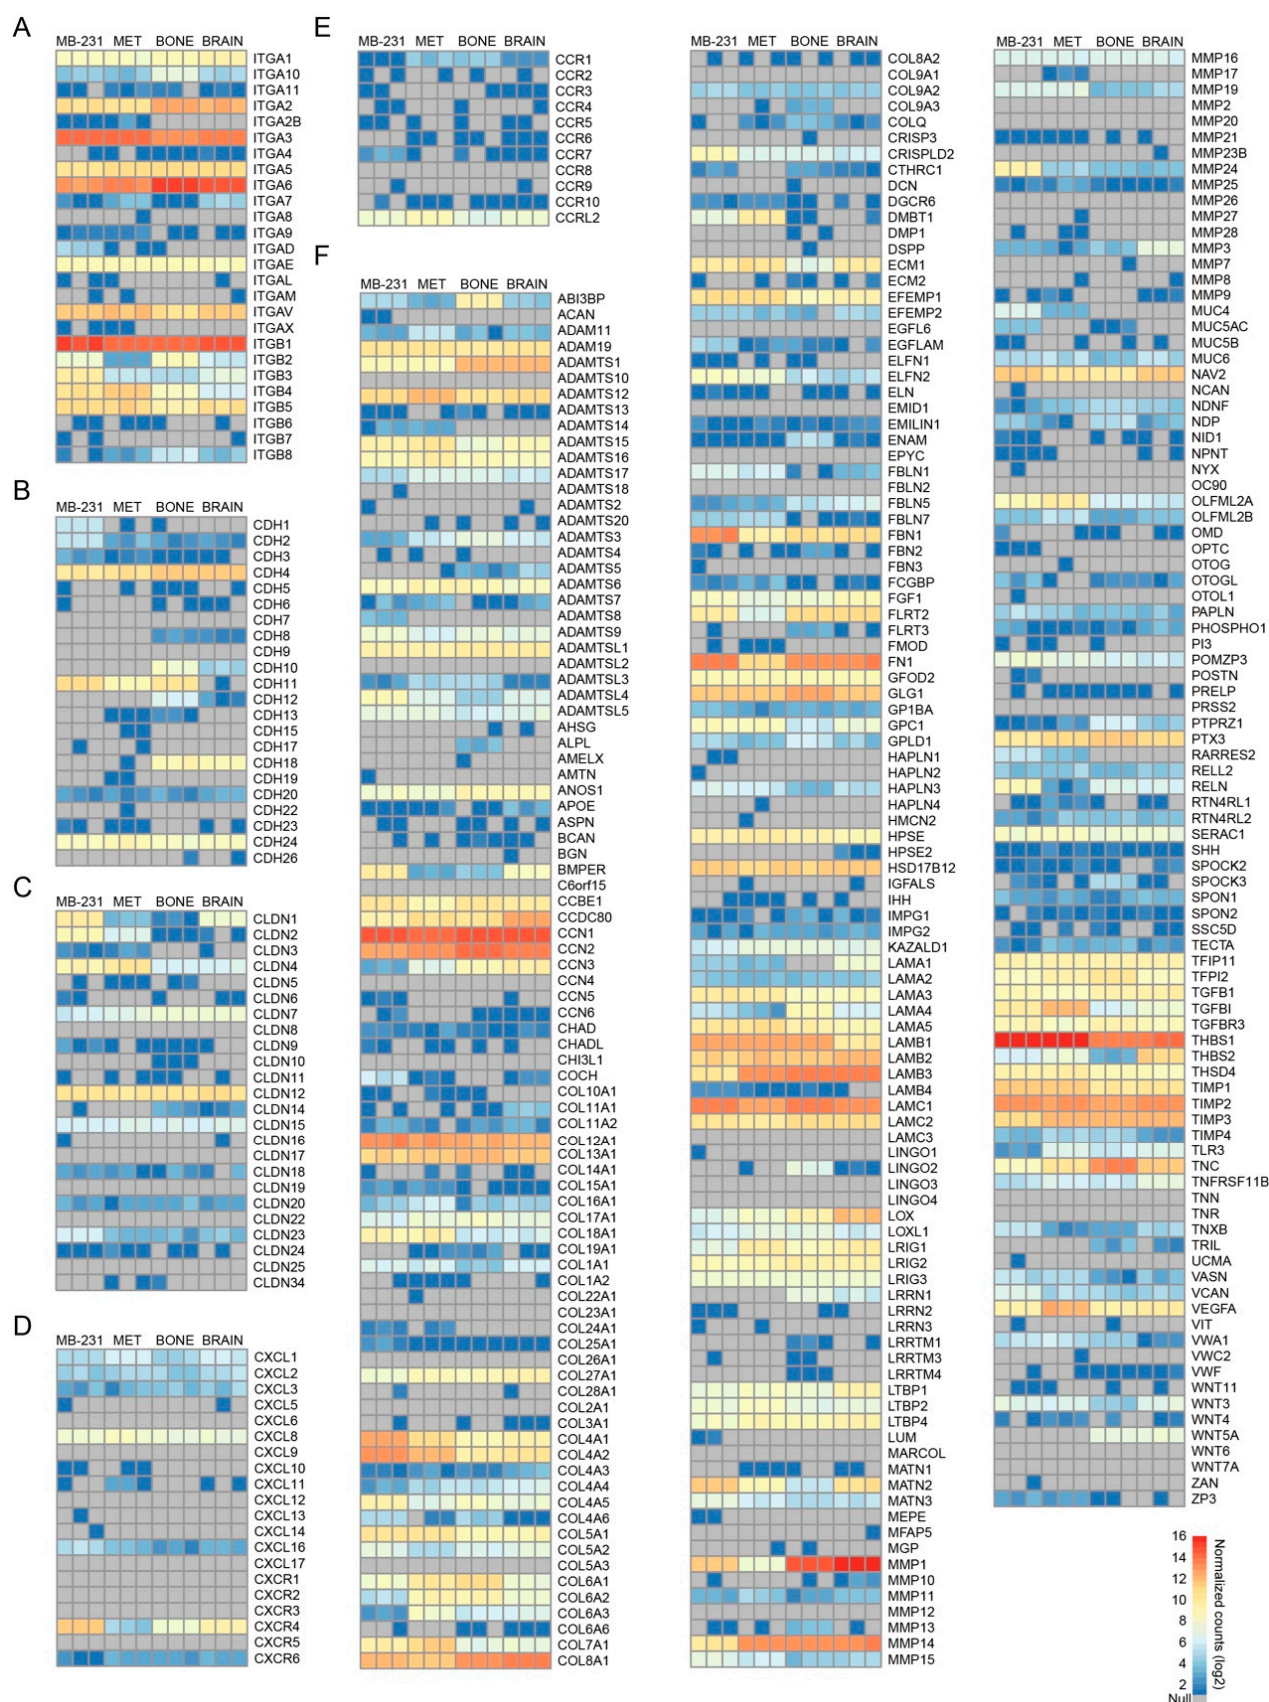

**Figure S8.** Differential gene expression in bone-seeking variants associated with different protein families. **A–F** Heatmaps of genes that are belonging to integrin (**A**), cadherin (**B**), claudin (**C**) protein families, chemokines and their receptors (**D**, **E**) and extracellular-matrix components (**F**, gene ontology list GO:0031012) are shown without prior filtering.



## Supplementary Videos

**Video S1–S11.** These videos depict breast cancer cell lines, as indicated in the name file, without and with motility. The elapsed time is shown in the right corner. Still images from these movies are shown in Figure 2 (B, Videos S1–S6); D, Videos S7–S11). (Format: mov; size: <1 MB).

**Video S12–S15.** These videos depict breast cancer cell lines, as indicated in the name file, during the cell division. The elapsed time is shown in the right corner. Still images from these movies are shown in Figure 3B. (Format: mov; size: <2 MB).

**Video S16–S17.** These videos depict breast cancer cell lines, as indicated in the name file, upon incubation with EGF. The elapsed time is shown in the right corner. Still images from these movies are shown in Figure 4 (E, right panels, Videos S16; F, Videos S7). (Format: mov; size: <1.5 MB).

**Table S1.** List of primary antibodies.

| Primary antibody   | Clone            | Manufacturer <sup>1</sup> | Dilution |       |             |
|--------------------|------------------|---------------------------|----------|-------|-------------|
|                    |                  |                           | WB       | FC    | ICC/<br>IHC |
| $\alpha$ -tubulin  | DM1A             | Sigma-Aldrich             | 1:2500   |       |             |
| $\alpha$ -SMA      | 1A4              | Sigma-Aldrich             |          |       | 1:200       |
| ARPC2 <sup>2</sup> | EPR8533          | Abcam                     | 1:1000   |       |             |
| CD9                | M-L13            | BD Biosciences            | 1:1000   |       |             |
| CD9-PE             | HI9a             | BioLegend                 |          | 1:20  |             |
| CD11b-PE           | M1/70.15.11.5    | Miltenyi Biotec           |          | 1:10  |             |
| CD11c-APC          | B-ly6            | BD Biosciences            |          | 1:5   |             |
| CD18               | 6.7              | BD Biosciences            |          | 1:50  |             |
| CD29               | 12G10            | Abcam                     | 1:500    |       |             |
| CD29-APC           | TS2/16           | BioLegend                 |          | 1:20  |             |
| CD41a-APC          | HIP8             | BD Biosciences            |          | 1:5   |             |
| CD44-PE            | G44-26           | BD Biosciences            |          | 1:5   |             |
| CD49d-APC          | MZ18-24A9        | Miltenyi Biotec           |          | 1:10  |             |
| CD49e-APC          | NKI-SAM-1        | BioLegend                 |          | 1:20  |             |
| CD49f              | GoH3             | BD Biosciences            |          | 1:50  |             |
| CD51-PE            | NKI-M9           | BioLegend                 |          | 1:20  |             |
| CD51/61-APC        | 23C6             | BioLegend                 |          | 1:20  |             |
| CD54               | HA58             | BD Biosciences            |          |       | 1:50        |
| CD54-PE            | HA58             | BD Biosciences            |          | 1:5   |             |
| CD57               | HNK-1            | Thermo Fisher Sc.         |          | 1:20  |             |
| CD61-APC           | VI-PL2           | BioLegend                 |          | 1:20  |             |
| CD62L-APC          | DREG-56          | BioLegend                 |          | 1:20  |             |
| CD63-PE            | CLB-gran/12, 435 | Sanquin                   |          | 1:10  |             |
| CD73-PE            | AD2              | BD Biosciences            |          | 1:5   |             |
| CD81               | M38              | Exbio                     |          | 1:100 | 1:100       |
| CD87-PE            | VIM5             | BioLegend                 |          | 1:20  |             |
| CD90               | 5E10             | BD Biosciences            |          | 1:50  |             |
| CD102-PE           | CBR-1C2/2        | BD Biosciences            |          | 1:5   |             |
| CD103-APC          | B-ly7            | Thermo Fisher Sc.         |          | 1:5   |             |
| CD104-PE           | 58XB4            | BioLegend                 |          | 1:20  |             |
| CD105              | 43A3             | BioLegend                 |          |       | 1:50        |
| CD105-PE           | SN6              | Thermo Fisher Sc.         |          | 1:5   |             |
| CD117-APC          | 104D2            | BioLegend                 |          | 1:20  |             |
| CD133-APC          | AC133            | Miltenyi Biotec           |          | 1:10  |             |
| CD133              | 80B258           | Karbanová et al. [3]      | 1:1667   |       |             |
| CD146-PE           | P1H12            | BD Biosciences            |          | 1:5   |             |
| CD162-PE           | KPL-1            | BioLegend                 |          | 1:5   |             |
| CD166-PE           | 3A6              | BD Biosciences            |          | 1:5   |             |
| CD184 <sup>2</sup> | UMB2             | Abcam                     | 1:500    |       |             |
| CD184              | 12G5             | BD Biosciences            |          | 1:50  | 1:50        |
| CD271-APC          | ME20.4-1.M4      | Miltenyi Biotec           |          | 1:10  |             |
| CD309-APC          | 7D4-6            | BioLegend                 |          | 1:20  |             |
| CD324              | 36/E-Cadherin    | BD Biosciences            | 1:5000   |       |             |
| CD325              | 32/N-Cadherin    | BD Biosciences            | 1:1000   |       |             |

|                                    |             |                      |              |
|------------------------------------|-------------|----------------------|--------------|
| c-erbB2 (HER-2) <sup>2</sup>       | as          | Dako                 | 1:600        |
| Estrogen receptor                  | SP1         | Ventana/Roche        | ready to use |
| EGF R <sup>2</sup>                 | D38B1       | Cell Signaling Tech. | 1:1000       |
| EGF R-APC                          | AY13        | BioLegend            | 1:20         |
| FGF R2-APC                         | 98725       | Neuromics            | 1:5          |
| IgG1 isotype control-PE, APC       | MOPC-21     | BD Biosciences       | 1:5          |
| IgG2a isotype control-PE           | MOPC-173    | BioLegend            | 1:20         |
| IgG2b isotype control-PE, APC      | IS6-11E5.11 | Miltenyi Biotec      | 1:10         |
| Ki67                               | MIB-1       | Dako                 | 1:50         |
| MFG-E8                             | 278918      | R&D systems          | 1:25         |
| Nestin                             | 10C2        | Chemicon             | 1:100        |
| NG2-PE (CSPG4)                     | 7.1         | Beckman Coulter GmbH | 1:5          |
| PanCK                              | C11         | Santa Cruz Biotech.  | 1:33         |
| Progesterone receptor <sup>2</sup> | 1E2         | Roche                | ready to use |
| Vimentin                           | V9          | Santa Cruz Biotech.  | 1:33         |
| ZO-1 <sup>2</sup>                  | D6L1E       | Cell Signaling Tech. | 1:1000       |

<sup>1</sup>Abcam (Cambridge, UK); BD Biosciences (Heidelberg, Germany); Beckman Coulter GmbH (Krefeld, Germany); BioLegend (San Diego, CA, USA); Cell Signaling Technology (Danvers, MA, USA); Dako (Santa Clara, CA, USA); Exbio (Prague, Czech Republic); Chemicon (Temecula, CA, USA); Miltenyi Biotec (Bergisch Gladbach, Germany); Neuromics (Edina, MN, USA); R&D systems (Minneapolis, MN, USA); Sanquin (Amsterdam, The Netherlands); Santa Cruz Biotechnology, Inc. (Dallas, TX, USA); Sigma Aldrich (Darmstadt, Germany); Thermo Fisher Scientific (Waltham, MA, USA); Ventana/Roche (Mannheim, Germany).

<sup>2</sup>Antibody generated in rabbit.

As, antiserum; FC, flow cytometry; ICC, immunocytochemistry; IHC, immunohistochemistry; APC, allophycocyanin; PE, phycoerythrin; WB, immunoblotting.

**Table S2.** List of secondary antibodies.

| Secondary antibody                                                            | Manufacturer <sup>1</sup> | Dilution |       |         |
|-------------------------------------------------------------------------------|---------------------------|----------|-------|---------|
|                                                                               |                           | WB       | FC    | ICC/IHC |
| Alexa Fluor <sup>TM</sup> 488-conjugated goat anti-mouse IgG1 specific (H+L)  | Thermo Fisher Scientific  |          |       | 1:600   |
| Alexa Fluor <sup>TM</sup> 488-conjugated goat anti-mouse IgG2a specific (H+L) | Thermo Fisher Scientific  |          |       | 1:600   |
| Alexa Fluor <sup>TM</sup> 488-conjugated goat anti-rabbit IgG (H+L)           | Thermo Fisher Scientific  |          |       | 1:600   |
| Alexa Fluor <sup>TM</sup> 633-conjugated goat anti-mouse IgM specific (H+L)   | Thermo Fisher Scientific  |          | 1:600 |         |
| APC-conjugated F(ab') <sub>2</sub> goat anti-mouse                            | Thermo Fisher Scientific  |          | 1:100 |         |
| PE-conjugated F(ab') <sub>2</sub> donkey anti-rat IgG                         | Thermo Fisher Scientific  |          | 1:100 |         |
| PE-conjugated F(ab') <sub>2</sub> goat anti-mouse                             | Thermo Fisher Scientific  |          | 1:100 |         |
| HRP-conjugated AffiniPure goat anti-mouse IgG                                 | Jackson ImmunoResearch    | 1:3000   |       |         |
| HRP-conjugated AffiniPure goat anti-rabbit IgG                                | Jackson ImmunoResearch    | 1:3000   |       |         |

<sup>1</sup>Thermo Fisher Scientific (Waltham, MA, USA), Jackson ImmunoResearch Europe Ltd. (Ely, UK). APC, allophycocyanin; FC, flow cytometry; HRP, horseradish peroxidase; ICC, immunocytochemistry; IHC, immunohistochemistry; PE, phycoerythrin; WB, immunoblotting.

### Supplementary References

1. Freund, D.; Fonseca, A.V.; Janich, P.; Bornhäuser, M.; Corbeil, D. Differential expression of biofunctional GM1 and GM3 gangliosides within the plastic-adherent multipotent mesenchymal stromal cell population. *Cytotherapy* **2010**, *12*, 131–142, doi:10.3109/14653240903476438.
2. Corbeil, D.; Röper, K.; Hellwig, A.; Tavian, M.; Miraglia, S.; Watt, S.M.; Simmons P.J.; Peault, B.; Buck, D.W.; Huttner W.B. The human AC133 hematopoietic stem cell antigen is also expressed in epithelial cells and targeted to plasma membrane protrusions. *J. Biol. Chem.* **2000**, *275*, 5512–5520, doi:10.1074/jbc.275.8.5512.
3. Karbanová, J.; Missol-Kolka, E.; Fonseca, A.V.; Lorra, C.; Janich, P.; et al. The stem cell marker CD133 (Prominin-1) is expressed in various human glandular epithelia. *J. Histochem. Cytochem.* **2008**, *56*, 977–993, doi:10.1369/jhc.2008.951897.
