# Supplementary figures and images for: Decoding Single Cell Morphology in Osteotropic Breast Cancer Cells for Dissecting Their Migratory, Molecular and Biophysical Heterogeneity
Source: MDPI journal article supplement (doi:10.3390/cancers14030603), 2022-01-25

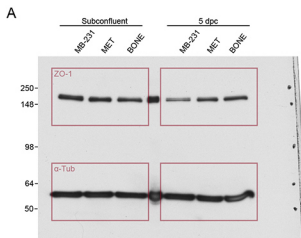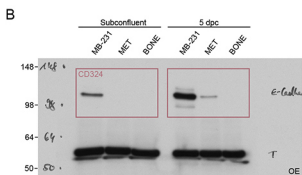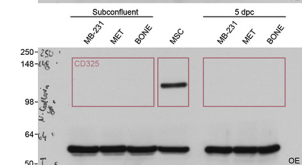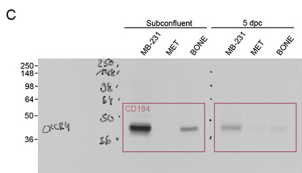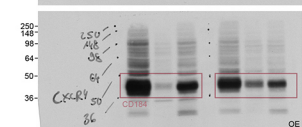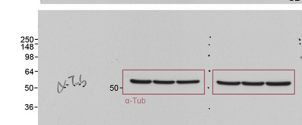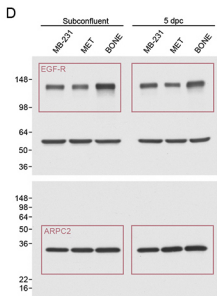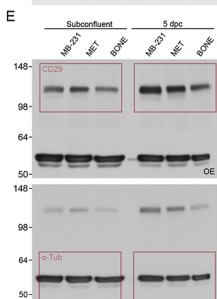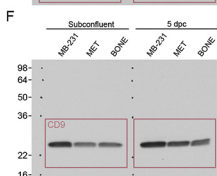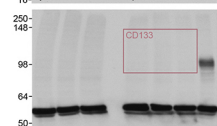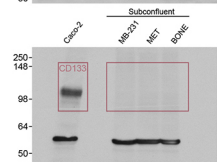

Supplement: s1 [file s1]
